# Supplementary material
Source: Springer Nature journal article supplement (https://www.springermedizin.de/resource/supplementary/12936_2013_3291_MOESM2_ESM.pdf/9545550)
Supplement: MOESM2 [file 9545550]

**1. Public Health Officers and other health workers:**

Can access remote areas and have one-on-one audience with the wider community

**2. Local Authorities:**

Can easily mobilise the community for a meeting

**The Community**

**4. School heads:**

Direct & indirect audience with large sections of the population through parents' meetings & their children

**3. Radio:**

Direct communication with large sections of the community, but can be confusing if used by companies selling competing drugs.
